# Supplementary material for: Reliability and validity of the Chinese version of the Nurses’ Health-Related Procrastination Scale (NHRPS) in Chinese nurses
Source: Research Square preprint supplement (doi:10.21203/rs.3.rs-6129932/v1), 2025-04-01
Supplement: Supplementary file 1 [file 69a93c3d0ee25008d17b6688.docx]

| always | often | sometimes | rarely | never | **Item** | **N** |
| --- | --- | --- | --- | --- | --- | --- |
| **Without any rational reasons for the delay and despite expecting to be worse off:** | | | | | | |
|  |  |  |  |  | I delay getting vaccinated and controlling my antibody titers for hepatitis, although these are essential for nurses | 1 |
|  |  |  |  |  | I delay adhering to the principles of ergonomics (proper body positions) when providing nursing care | 2 |
|  |  |  |  |  | I delay washing my hands, although it is essential for nurses' health | 3 |
|  |  |  |  |  | I delay my medical checkups, although medical services are available | 4 |
|  |  |  |  |  | I delay my doctor's visit, although the doctor is available | 5 |
|  |  |  |  |  | I'm late for tests (i.e. pap smear, X-ray), although appointments are available | 6 |
|  |  |  |  |  | I delay monitoring my blood pressure, although devices are available | 7 |
|  |  |  |  |  | I delay having enough sleep and rest, although they are necessary for nurses' health | 8 |
|  |  |  |  |  | I delay exercising | 9 |
|  |  |  |  |  | I delay weight control program | 10 |
|  |  |  |  |  | I delay having a healthier diet | 11 |
|  |  |  |  |  | I delay quitting tobacco use (i.e. cigarettes, hookah) | 12 |
|  |  |  |  |  | I delay quitting substance abuse (i.e. opioid, drugs) | 13 |
|  |  |  |  |  | I delay quitting drinking alcohol | 14 |
|  |  |  |  |  | I delay adhering to safety principles (gowns, masks, gloves, glasses) when providing nursing care | 15 |
|  |  |  |  |  | I delay seeking help and treatment for my mental health problems | 16 |
|  |  |  |  |  | I delay activities that make me happy (i.e. travel and leisure) | 17 |
|  |  |  |  |  | I delay releasing my feelings after dealing with stressful cases in the hospital | 18 |
|  |  |  |  |  | I delay meeting my friends and relatives | 19 |
|  |  |  |  |  | I delay socializing with my colleagues | 20 |
|  |  |  |  |  | I delay the establishment of intimate relationships with my family | 21 |
|  |  |  |  |  | I delay managing my finances | 22 |
|  |  |  |  |  | I delay learning new skills and acquiring new knowledge related to my profession | 23 |
|  |  |  |  |  | I delay pursuing things that improve my social status (i.e. higher education) | 24 |
|  |  |  |  |  | I delay participating in group activities with my colleagues | 25 |
|  |  |  |  |  | I delay attending to my spirituality | 26 |
|  |  |  |  |  | I delay my spiritual obligations | 27 |
|  |  |  |  |  | I delay reading spiritual books | 28 |
|  |  |  |  |  | I delay attending spiritual ceremonies | 29 |
|  | | | | | Total score | |

Procrastination in maintaining physical health (8 items): 1, 2, 3, 4, 5, 6, 7, 15

Procrastination in physical health promotion (4 items): 8, 9, 10, 11

Procrastination in quitting high-risk behaviors (3 items): 12, 13, 14

Procrastination in social and mental health (10 items): 16, 17, 18, 19, 20, 21, 22, 23, 24, 25

Procrastination in spiritual health (4 items): 26, 27, 28, 29

This instrument was designed based on a 5-point Likert-type scale and the following values were assigned to responses provided for Likert Scale items: Never = 1, Rarely = 2, Sometimes = 3, Often = 4, and Always = 5. The minimum and maximum scores of this scale were 29 and, 145 respectively, with a higher score indicating more health related procrastination rate.
