# Supplementary material for: Reliability and validity of the Chinese version of the Nurses’ Health-Related Procrastination Scale (NHRPS) in Chinese nurses
Source: Research Square preprint supplement (doi:10.21203/rs.3.rs-6129932/v1), 2025-04-01
Supplement: Supplementary file 1 [file 82ad00220848a9c383ea5249.pdf]

## Approval Letter of Shanghai General Hospital Institutional Review Board

Number: Yuanlun Kuai[ 2025] 038

|                     |                                                                                                                                                                                                                                                                     |                                                                                                                                                                                                                                                                                                               |                                                   |
|---------------------|---------------------------------------------------------------------------------------------------------------------------------------------------------------------------------------------------------------------------------------------------------------------|---------------------------------------------------------------------------------------------------------------------------------------------------------------------------------------------------------------------------------------------------------------------------------------------------------------|---------------------------------------------------|
| Research Plan Name  | Research on the localization and application of nurse health-related procrastination scale                                                                                                                                                                          |                                                                                                                                                                                                                                                                                                               |                                                   |
| Scheme Number       | Unregistered clinical trial 2024120044737110                                                                                                                                                                                                                        |                                                                                                                                                                                                                                                                                                               |                                                   |
| Applicant           | Researchers initiate                                                                                                                                                                                                                                                | CRO                                                                                                                                                                                                                                                                                                           | /                                                 |
| Research center     | Shanghai General Hospital                                                                                                                                                                                                                                           |                                                                                                                                                                                                                                                                                                               |                                                   |
| Research Department | nursing department                                                                                                                                                                                                                                                  | Principal investigator                                                                                                                                                                                                                                                                                        | Chen Lan                                          |
| Review Time         | 2025.01.20                                                                                                                                                                                                                                                          | Review location                                                                                                                                                                                                                                                                                               | Esite system                                      |
| Review Category     | Initial review                                                                                                                                                                                                                                                      | Form of review                                                                                                                                                                                                                                                                                                | Quick review                                      |
| Meeting Results     | <b>Research plan</b><br>Conclusion: agree                                                                                                                                                                                                                           |                                                                                                                                                                                                                                                                                                               | <b>Informed Consent Form</b><br>Conclusion: agree |
|                     | Tracking review frequency<br>(From the date of approval of the experiment)                                                                                                                                                                                          | <input type="checkbox"/> 3 months <input type="checkbox"/> 6 months <input type="checkbox"/> 9 months <input checked="" type="checkbox"/> 12 months<br><input type="checkbox"/> Other<br>The ethics committee may change the frequency of tracking and review based on the actual situation of the experiment |                                                   |
| Review Opinions     | Signature of Chairman/Authorizer: <br>Ethics Committee (seal): <br>Date: January 20, 2025 |                                                                                                                                                                                                                                                                                                               |                                                   |

Address: 100 Haining Road, Shanghai, Postal Code: 200080
