# Supplementary material for: Reliability and validity of the Chinese version of the Nurses’ Health-Related Procrastination Scale (NHRPS) in Chinese nurses
Source: Research Square preprint supplement (doi:10.21203/rs.3.rs-6129932/v1), 2025-04-01
Supplement: Supplementary file 2 [file 9bfe9d0f234e03d7122274fd.docx]

**Table 1** Item analysis of the Chinese version of the NHRPS (N=167)

| **Item** | **CR** | **Correlation coefficient** |
| --- | --- | --- |
|
| 1 | 8.160** | .564** |
| 2 | 7.123** | .548** |
| 3 | 5.613** | .452** |
| 4 | 5.376** | .469** |
| 5 | 8.884** | .617** |
| 6 | 8.062** | .545** |
| 7 | 8.559** | .570** |
| 8 | 7.093** | .543** |
| 9 | 10.179** | .655** |
| 10 | 8.173** | .583** |
| 11 | 9.024** | .613** |
| 12 | 9.588** | .632** |
| 13 | 3.238** | .336** |
| 14 | 3.448** | .349** |
| 15 | 9.454** | .625** |
| 16 | 8.026** | .630** |
| 17 | 9.613** | .641** |
| 18 | 11.726** | .653** |
| 19 | 12.000** | .634** |
| 20 | 11.173** | .666** |
| 21 | 9.199** | .589** |
| 22 | 8.375** | .563** |
| 23 | 14.235** | .692** |
| 24 | 13.394** | .727** |
| 25 | 12.056** | .719** |
| 26 | 11.512** | .682** |
| 27 | 10.296** | .622** |

** *P*<0.01

**Table 2** Calculation of expert ratings and content validity indices

| **Item** | **Expert Ratings** | | | | | | | | | | **All of ratings 3 and 4** | **I-CVI** |
| --- | --- | --- | --- | --- | --- | --- | --- | --- | --- | --- | --- | --- |
| **A** | **B** | **C** | **D** | **E** | **F** | **G** | **H** | **I** | **J** |
| 1 | 4 | 4 | 4 | 4 | 4 | 4 | 4 | 4 | 4 | 4 | 10 | 1 |
| 2 | 4 | 4 | 4 | 4 | 4 | 3 | 3 | 4 | 4 | 3 | 10 | 1 |
| 3 | 4 | 4 | 4 | 4 | 4 | 4 | 4 | 4 | 4 | 4 | 10 | 1 |
| 4 | 4 | 4 | 4 | 4 | 4 | 4 | 4 | 4 | 4 | 4 | 10 | 1 |
| 5 | 4 | 4 | 4 | 4 | 4 | 4 | 4 | 4 | 4 | 4 | 10 | 1 |
| 6 | 4 | 4 | 4 | 3 | 4 | 4 | 4 | 4 | 4 | 4 | 10 | 1 |
| 7 | 4 | 3 | 2 | 4 | 4 | 3 | 2 | 4 | 3 | 4 | 8 | 0.8 |
| 8 | 4 | 4 | 4 | 4 | 4 | 4 | 4 | 4 | 4 | 4 | 10 | 1 |
| 9 | 4 | 4 | 4 | 4 | 4 | 4 | 4 | 4 | 4 | 4 | 10 | 1 |
| 10 | 4 | 4 | 4 | 4 | 4 | 3 | 3 | 4 | 4 | 4 | 10 | 1 |
| 11 | 4 | 4 | 4 | 4 | 4 | 4 | 4 | 4 | 4 | 4 | 10 | 1 |
| 12 | 4 | 3 | 4 | 4 | 4 | 4 | 4 | 4 | 3 | 4 | 10 | 1 |
| 13 | 3 | 4 | 4 | 4 | 4 | 4 | 4 | 4 | 4 | 4 | 10 | 1 |
| 14 | 3 | 4 | 3 | 4 | 4 | 4 | 2 | 4 | 4 | 4 | 9 | 0.9 |
| 15 | 4 | 3 | 4 | 4 | 4 | 4 | 4 | 4 | 3 | 4 | 10 | 1 |
| 16 | 4 | 4 | 4 | 2 | 4 | 4 | 4 | 4 | 4 | 4 | 9 | 0.9 |
| 17 | 4 | 4 | 4 | 4 | 4 | 4 | 3 | 4 | 4 | 4 | 10 | 1 |
| 18 | 4 | 4 | 4 | 4 | 3 | 4 | 4 | 4 | 4 | 4 | 10 | 1 |
| 19 | 4 | 4 | 4 | 4 | 4 | 3 | 4 | 4 | 4 | 4 | 10 | 1 |
| 20 | 4 | 3 | 3 | 4 | 4 | 4 | 4 | 3 | 4 | 4 | 10 | 1 |
| 21 | 4 | 4 | 4 | 4 | 4 | 4 | 3 | 4 | 4 | 4 | 10 | 1 |
| 22 | 4 | 4 | 4 | 4 | 4 | 4 | 4 | 4 | 4 | 4 | 10 | 1 |
| 23 | 4 | 4 | 4 | 4 | 4 | 4 | 4 | 4 | 4 | 4 | 10 | 1 |
| 24 | 4 | 4 | 2 | 3 | 4 | 3 | 4 | 4 | 4 | 4 | 9 | 0.9 |
| 25 | 4 | 4 | 4 | 4 | 4 | 4 | 4 | 4 | 4 | 4 | 10 | 1 |
| 26 | 4 | 4 | 4 | 4 | 4 | 4 | 4 | 4 | 4 | 4 | 10 | 1 |
| 27 | 4 | 4 | 3 | 4 | 4 | 4 | 4 | 3 | 4 | 4 | 10 | 1 |

**Table 3** Reliability results for each dimension and total table

|  | **Cronbach’s α coefficient** | **Split-half reliability coefficient** | **Test–retest reliability coefficient** |
| --- | --- | --- | --- |
| procrastination in maintaining physical health | 0.876 | 0.849 | 0.815 |
| procrastination in physical health promotion | 0.860 | 0.817 | 0.782 |
| procrastination in social and mental health | 0.885 | 0.875 | 0.838 |
| procrastination in spiritual health | 0.881 | 0.847 | 0.743 |
| NHRPS | 0.930 | 0.778 | 0.924 |
