# Supplementary material for: Reliability and validity of the Chinese version of the Nurses’ Health-Related Procrastination Scale (NHRPS) in Chinese nurses
Source: Research Square preprint supplement (doi:10.21203/rs.3.rs-6129932/v1), 2025-04-01
Supplement: Supplementary file 3 [file ecece2a655e417c09b06249b.docx]

**Nurses’Health-Related Procrastination Scale**

Guidance: The following items are those that occur without any reasonable reason for the delay and despite expecting to be worse off. To investigate your current health-related procrastination behavior. Please answer according to the actual situation, in the corresponding number "✓"

| **Rating: 1 = never, 2 = rarely, 3 = sometimes, 4 = often, 5 = always** | | | | | | |
| --- | --- | --- | --- | --- | --- | --- |
| **N** | **Item** | **1** | **2** | **3** | **4** | **5** |
| 1 | I delay getting vaccinated and controlling my antibody titers for hepatitis, although these are essential for nurses | 1 | 2 | 3 | 4 | 5 |
| 2 | I delay adhering to the principles of ergonomics (proper body positions) when providing nursing care | 1 | 2 | 3 | 4 | 5 |
| 3 | I delay my hand hygiene, although it is essential for nurses' health | 1 | 2 | 3 | 4 | 5 |
| 4 | I delay my medical checkups, although medical services are available | 1 | 2 | 3 | 4 | 5 |
| 5 | I delay my doctor's visit, although the doctor is available | 1 | 2 | 3 | 4 | 5 |
| 6 | I delayed my scheduled test | 1 | 2 | 3 | 4 | 5 |
| 7 | I delay monitoring health-related indicators (such as blood pressure), although devices are available | 1 | 2 | 3 | 4 | 5 |
| 8 | I delay taking occupational protection measures (gowns, masks, gloves, glasses) when providing nursing care | 1 | 2 | 3 | 4 | 5 |
| 9 | I delay having enough sleep and rest, although they are necessary for nurses' health | 1 | 2 | 3 | 4 | 5 |
| 10 | I delay exercising | 1 | 2 | 3 | 4 | 5 |
| 11 | I delay weight control program | 1 | 2 | 3 | 4 | 5 |
| 12 | I delay having a healthier diet | 1 | 2 | 3 | 4 | 5 |
| 13 | I delay seeking help and treatment for my mental health problems | 1 | 2 | 3 | 4 | 5 |
| 14 | I delay activities that make me happy (i.e. travel) | 1 | 2 | 3 | 4 | 5 |
| 15 | I delay releasing my feelings after dealing with stressful cases in the hospital | 1 | 2 | 3 | 4 | 5 |
| 16 | I delay meeting my friends and relatives | 1 | 2 | 3 | 4 | 5 |
| 17 | I delay socializing with my colleagues | 1 | 2 | 3 | 4 | 5 |
| 18 | I delay the establishment of intimate relationships with my family | 1 | 2 | 3 | 4 | 5 |
| 19 | I delay learning new skills and acquiring new knowledge related to my profession | 1 | 2 | 3 | 4 | 5 |
| 20 | I delay pursuing things that improve my social status (i.e. higher education) | 1 | 2 | 3 | 4 | 5 |
| 21 | I delay participating in group activities with my colleagues | 1 | 2 | 3 | 4 | 5 |
| 22 | I delay attending to my spirituality | 1 | 2 | 3 | 4 | 5 |
| 23 | I delay my self-reflection and pursuit of life value | 1 | 2 | 3 | 4 | 5 |
| 24 | I delay reading books that promote spiritual health | 1 | 2 | 3 | 4 | 5 |
| 25 | I delay participating in activities or ceremonies that promote spiritual health | 1 | 2 | 3 | 4 | 5 |
| Total score | |  | | | | |

The Nurses' Health-Related Procrastination Scale consists of 25 items distributed across four dimensions: procrastination in maintaining physical health (items 1~8), procrastination in physical health promotion (items 9~12), procrastination in social and mental health (items 13~21), and procrastination in spiritual health (items 22~25). Responses were rated on a Likert 5-point scale, ranging from "never" (1 point) to "always" (5 points). A higher total score indicates a greater degree of health-related procrastination behavior among nurses. The overall Cronbach's α coefficient for the scale was 0.930, demonstrating excellent reliability and validity.
